# Supplementary material
Source: publisher site journal article supplement (https://www.dovepress.com/get_supplementary_file.php?f=351827.docx)
Supplement: Supplementary file 1 [file get_supplementary_file.php]

**Supplementary material**

Use of Azithromycin during COVID-19 pandemic in Jordan

This questionnaire explores the opinion of pharmacists on the antibiotic azithromycin (Zomax, Zaha, Zithromax, etc.) demand during the covid-19 pandemic in Jordan. It consists of 14 questions and should only take a few minutes to fill. Your participation is highly appreciated.

Data collected will strictly be used for research purposes, and the information provided by each pharmacist will be anonymous. Therefore, filling out the questionnaire will be considered a consent to participate.

Gender?

Female

Male

Age group?

22-30

30-40

over 40

Are you a practicing pharmacist?

Yes

No

How long have you been working as a pharmacist?

0-5 years

5-10 years

More than 10 years

Before the pandemic, how many packs of Azithromycin did you use to stock at your pharmacy?

5-10 packs

10-20 packs

20-40 packs

more than 40 packs

During the pandemic, how many packs of Azithromycin are you stocking at your pharmacy?

5-10 packs

10-20 packs

20-40 packs

more than 40 packs

Have you realized an increase in Azithromycin sales during the pandemic?

Yes

No

Maybe

How many Azithromycin containing prescriptions did you use to get per month before the pandemic?

0-5

5-10

10-20

more than 20

How many Azithromycin containing prescriptions are you receiving per month during the pandemic?

0-5

5-10

10-20

More than 20

During the pandemic, how many times per month have you been asked for Azithromycin without a prescription?

0-5

5-10

10-20

more than 20

During the pandemic, have you felt a need to order more Azithromycin packs than before?

Yes

No

Maybe

Have you noticed an increase in Azithromycin sales and or demand during the pandemic?

Yes

No

Maybe

Do you believe that Azithromycin could have a positive effect on Covid-19 patients?

Yes

No

Maybe

Do you believe that increased use of azithromycin for the treatment of viral infections could lead to negative consequences?

Yes

No

Maybe
